# Supplementary material
Source: HighWire-hosted journal article supplement (https://bmjopen.bmj.com/content/8/1/e019431)
Supplement: inline-supplementary-material-1 [file inline-supplementary-material-1.pdf]

Table of odds ratios for the comparison of patient-texted versus automatic-transmission from a generalised estimating equations model fitted to the repeated measures outcome data, after restricting the sample to those patients recording over 50 readings

| Outcome                     | Automatic transmission | Patient texted        | OR   | 95% CI of OR | Robust Z-scores |
|-----------------------------|------------------------|-----------------------|------|--------------|-----------------|
| Double zero                 | 0.8%<br>(168/19861)    | 1.5%<br>(450/30192)   | 1.76 | 1.47 to 2.10 | 6.21            |
| Systolic end digit of zero  | 9.5%<br>(1885/19861)   | 10.4%<br>(3140/30192) | 1.10 | 1.03 to 1.17 | 3.02            |
| Diastolic end digit of zero | 9.6%<br>(1907/19861)   | 10.4%<br>(3135/30192) | 1.10 | 1.02 to 1.18 | 2.43            |
| Systolic 134 <sup>1</sup>   | 4.1%<br>(255/6248)     | 6.5%<br>(777/11987)   | 1.58 | 1.30 to 1.92 | 4.54            |
| Diastolic 84 <sup>2</sup>   | 5.5%<br>(283/5183)     | 9.0%<br>(565/6272)    | 1.58 | 1.26 to 1.98 | 3.92            |

<sup>1</sup>Only includes patients using the standard protocol with median systolic BP in the range of 130 to 138.

<sup>2</sup>Only includes patients using the standard protocol with median diastolic BP in the range of 82 to 86.
