# Supplementary material
Source: HighWire-hosted journal article supplement (https://bmjopen.bmj.com/content/8/1/e019431)
Supplement: inline-supplementary-material-2 [file inline-supplementary-material-2.pdf]

Table of odds ratios for the comparison of patient-texted versus automatic-transmission from a generalised estimating equations model fitted to the repeated measures outcome data, after restricting the sample to those patients with median systolic BP above 120 and median diastolic BP above 80

| Outcome                     | Automatic transmission | Patient texted        | OR   | 95% CI of OR | Robust Z-scores |
|-----------------------------|------------------------|-----------------------|------|--------------|-----------------|
| Double zero                 | 0.9%<br>(142/15808)    | 1.7%<br>(361/21054)   | 1.93 | 1.57 to 2.37 | 6.24            |
| Systolic end digit of zero  | 9.7%<br>(1539/15808)   | 10.8%<br>(2264/21054) | 1.11 | 1.04 to 1.20 | 2.94            |
| Diastolic end digit of zero | 9.4%<br>(1489/15808)   | 10.1%<br>(2120/21054) | 1.09 | 1.01 to 1.17 | 2.25            |
